# Supplementary material
Source: Research Square preprint supplement (doi:10.21203/rs.3.rs-9173099/v1)
Supplement: Supplementary file 1 [file 0f5b9ed0fbb203a359d20042.pdf]

## TABLES

**Table 1. Hamstring activity levels and activity shares following the sprint protocol**

|     | Activity level (%) |           | Activity share (%) |           |
|-----|--------------------|-----------|--------------------|-----------|
|     | Mean (SD)          | 95% CI    | Mean (SD)          | 95% CI    |
| ST  | 16.6 (9.9)         | 13.1–20.1 | 34.7 (10.8)        | 30.5–38.6 |
| SM  | 7.3 (4.5) *        | 5.7–9.1   | 17.6 (8.6) *       | 14.5–21.1 |
| BFL | 11.1 (4.9) *†      | 9.2–13.1  | 25.2 (6.4) *†      | 22.8–27.7 |
| BFS | 9.9 (5.2) *        | 8.0–11.9  | 22.4 (11.8) *      | 18.6–26.3 |

Values are presented as means and standard deviations (SD). Asterisks indicate a significant difference (adjusted  $P < 0.05$  for multiple comparison) from the semitendinosus (ST) in activity level or activity share. Daggers indicate a significant difference (adjusted  $P < 0.05$ ) from the semimembranosus (SM) in each measure. Abbreviations: CI, confidence interval; BFL, biceps femoris long head; BFS, biceps femoris short head.

**Table 2. Correlations between hamstring activity measures and sprint performance variables**

|                    | 100-m seasonal best time |          | 60-m sprint time |          |
|--------------------|--------------------------|----------|------------------|----------|
|                    | <i>r</i>                 | <i>P</i> | <i>r</i>         | <i>P</i> |
| Activity level (%) |                          |          |                  |          |
| ST                 | 0.110                    | 0.593    | −0.043           | 0.836    |
| SM                 | 0.035                    | 0.863    | −0.141           | 0.493    |
| BFL                | −0.047                   | 0.819    | 0.072            | 0.726    |
| BFS                | −0.208                   | 0.307    | −0.014           | 0.947    |
| Activity share (%) |                          |          |                  |          |
| ST                 | 0.185                    | 0.366    | −0.185           | 0.366    |
| SM                 | 0.130                    | 0.527    | 0.298            | 0.139    |
| BFL                | −0.003                   | 0.990    | 0.097            | 0.636    |
| BFS                | −0.320                   | 0.111    | −0.123           | 0.550    |

The 60-m sprint time was defined as the fastest of the three maximal sprint trials performed during the sprint protocol.
